# Supplementary material
Source: bioRxiv or medRxiv preprint supplement (https://www.medrxiv.org/content/medrxiv/early/2021/09/27/2021.09.23.21264018/DC1/embed/media-1.pdf)

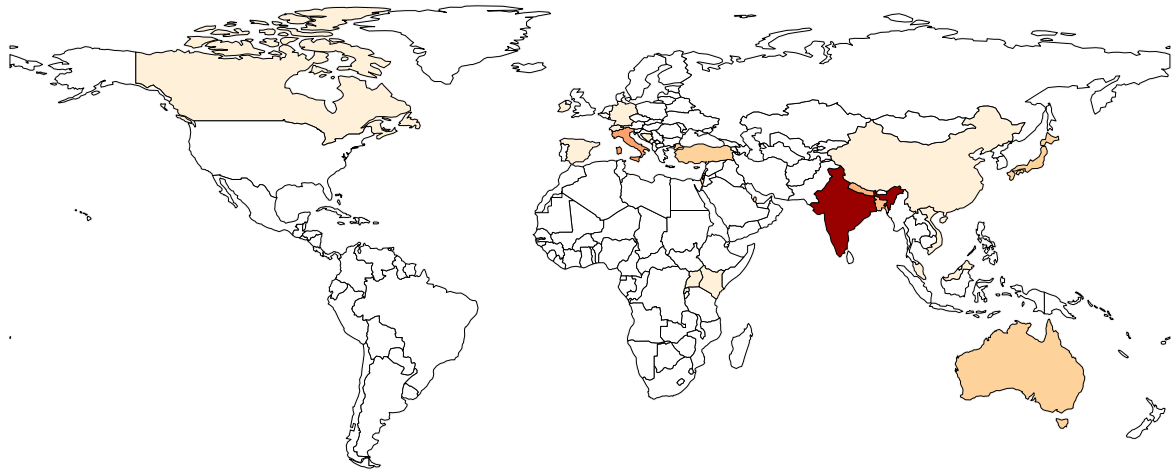

Inferred  
Introduction  
Events

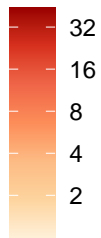

Supplement: Supplementary file [file media-1.pdf]
